# Supplementary material
Source: PubMed Central journal article supplement (PMC10086874)
Supplement: ajtr0015-1640-f8.pdf [file ajtr0015-1640-f8.pdf]

# The function of COL1A1 in GC

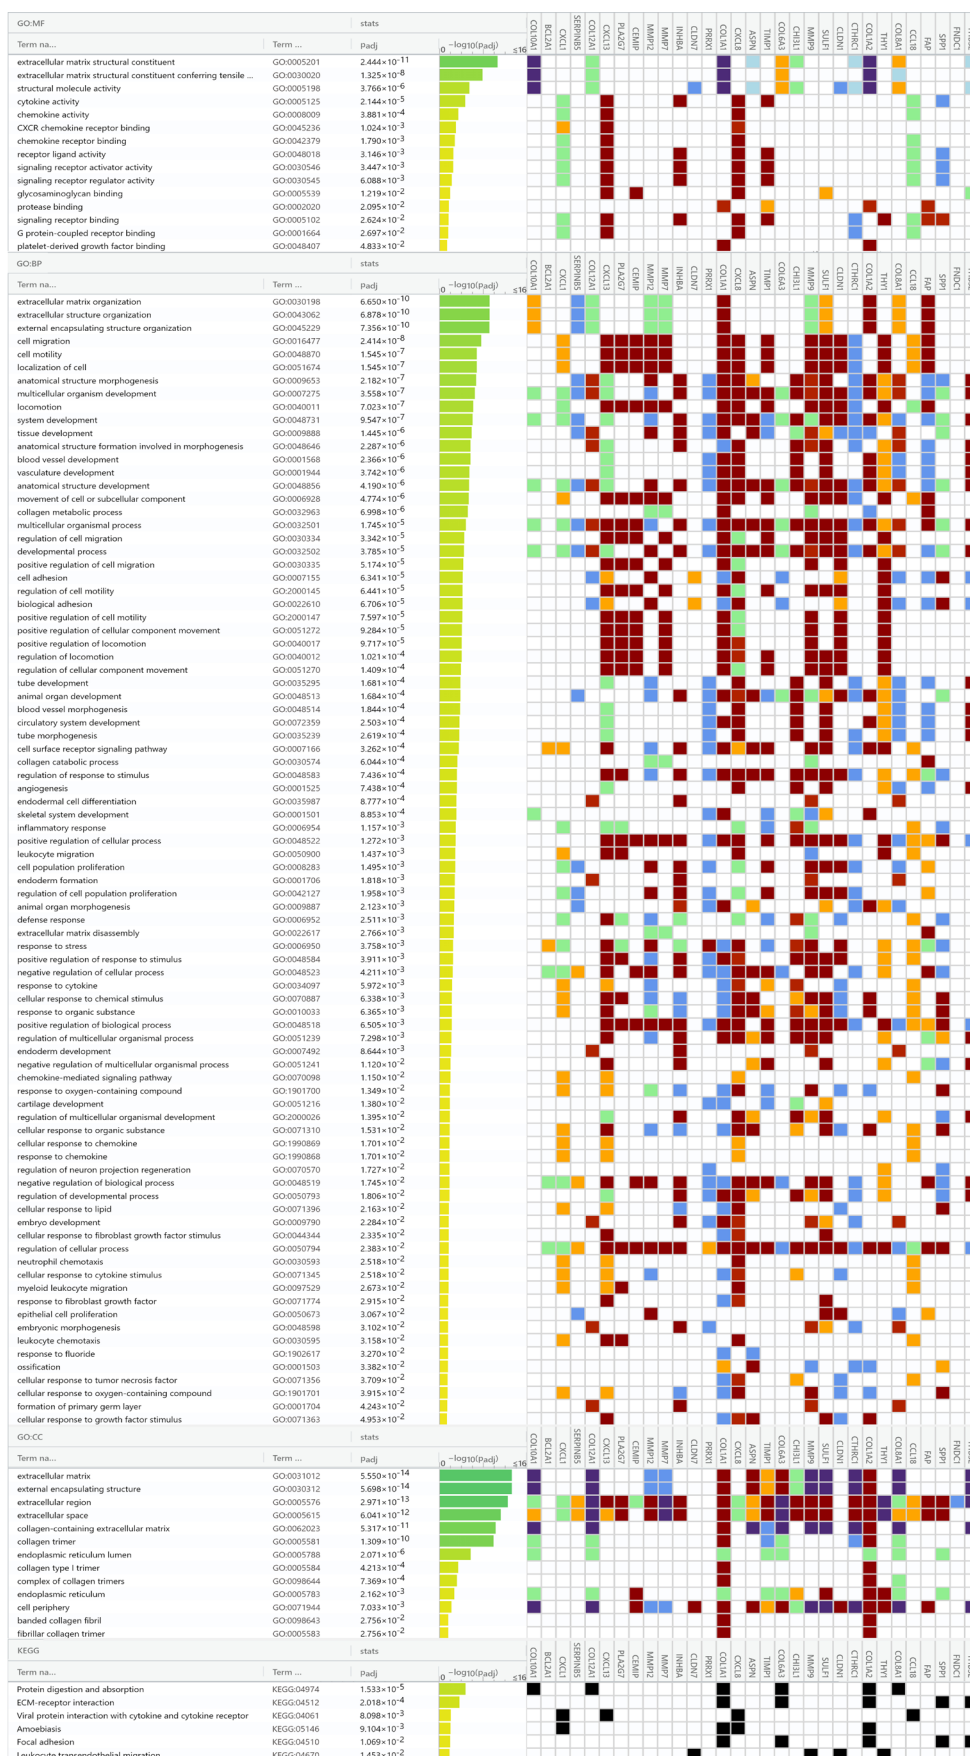

**Figure S2.** The function enrichment analysis of up-regulated genes in GC. The MF, BP, CC and KEGG pathway were list with term name, ID, p-value and enriched genes. The significance threshold was g.SCS threshold.

## The function of COL1A1 in GC

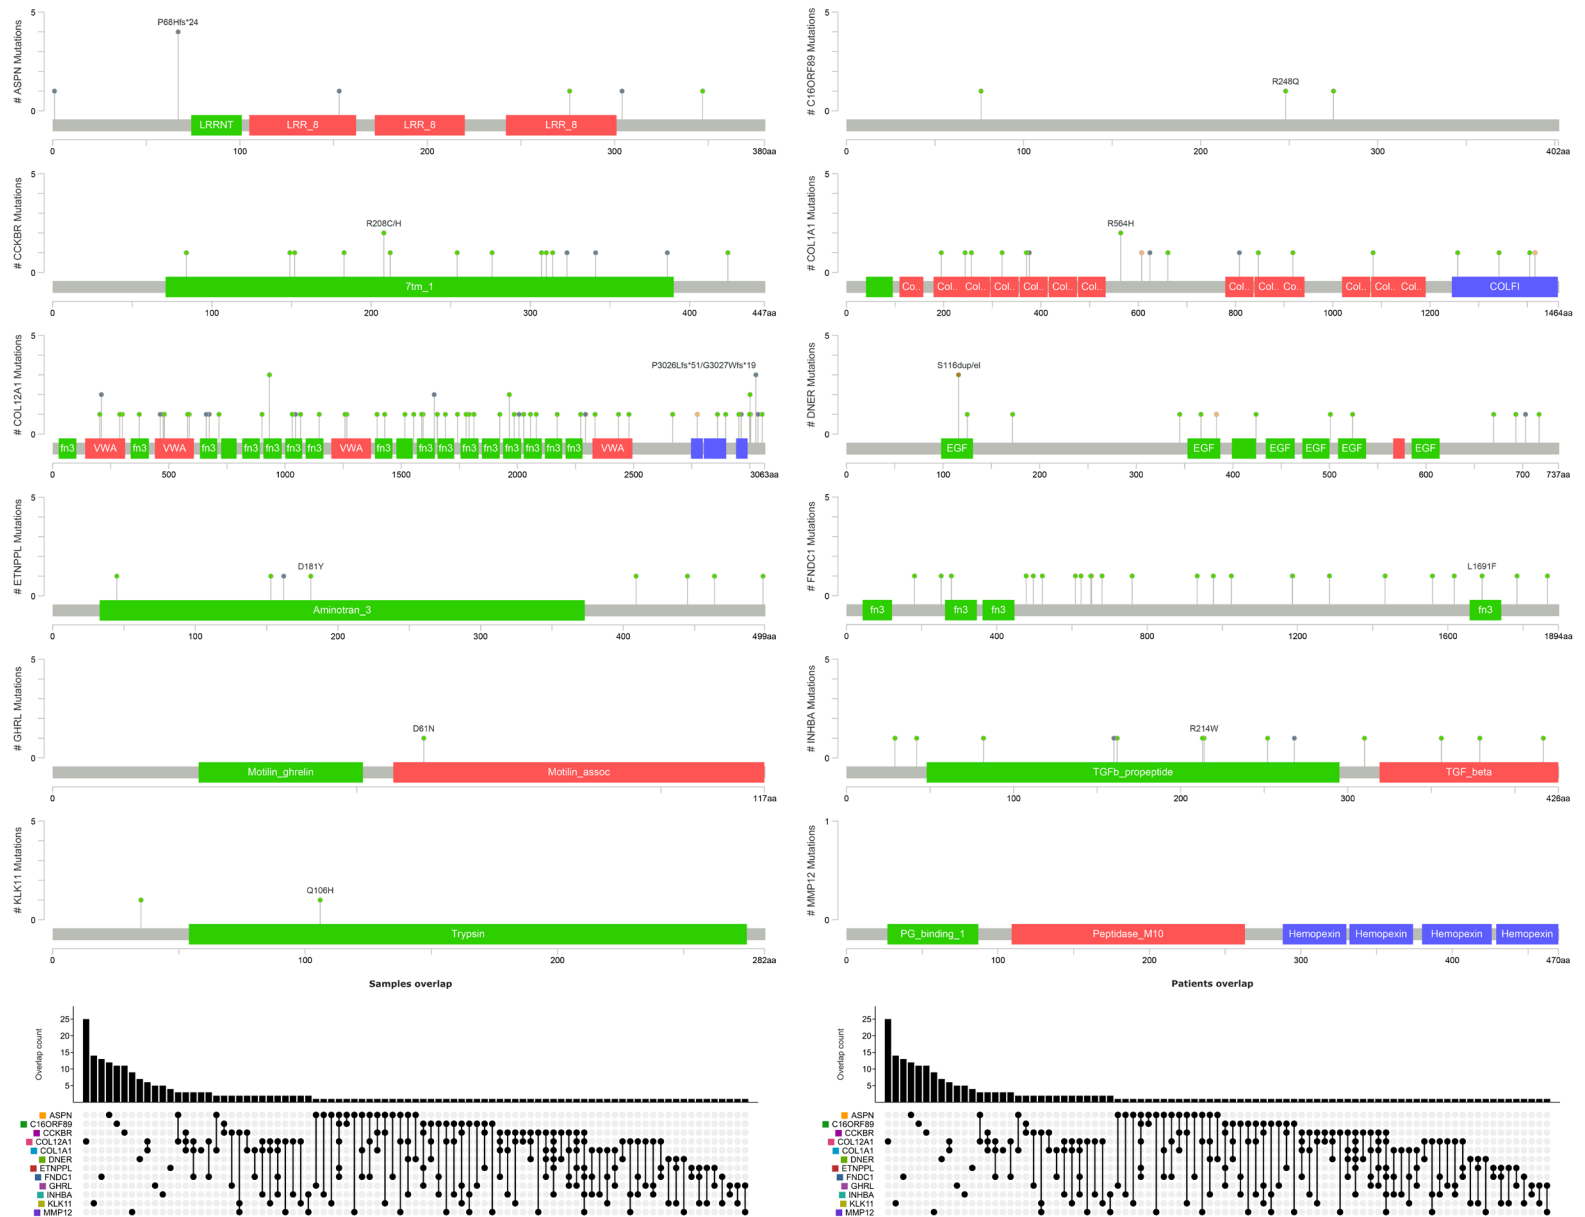

**Figure S3.** The mutation diagram of 12 DEGs (ASPN, C16orf89, CCKBR, COL1A1, COL12A1, DNER, ETNPPL, FNDC1, GHRL, INHBA, KLK11 and MMP12). The mutation data was obtained from TCGA. The overlap diagram of patients or samples were listed at the bottom.

## The function of COL1A1 in GC

| GO:MF                                                              |            |                        | stats                 |     |        |         |     |     |     |
|--------------------------------------------------------------------|------------|------------------------|-----------------------|-----|--------|---------|-----|-----|-----|
| Term na...                                                         | Term ...   | Padj                   | $-\log_{10}(P_{adj})$ | ASP | COL1A1 | COL12A1 | FND | INH | MMP |
| extracellular matrix structural constituent                        | GO:0005201 | $2.043 \times 10^{-3}$ | 0                     |     |        |         |     |     |     |
| extracellular matrix structural constituent conferring tensile ... | GO:0030020 | $1.010 \times 10^{-2}$ |                       |     |        |         |     |     |     |
| collagen binding                                                   | GO:0005518 | $2.878 \times 10^{-2}$ |                       |     |        |         |     |     |     |
| GO:BP                                                              |            |                        | stats                 |     |        |         |     |     |     |
| Term na...                                                         | Term ...   | Padj                   | $-\log_{10}(P_{adj})$ | ASP | COL1A1 | COL12A1 | FND | INH | MMP |
| response to fluoride                                               | GO:1902617 | $3.589 \times 10^{-4}$ |                       |     |        |         |     |     |     |
| odontogenesis                                                      | GO:0042476 | $1.858 \times 10^{-3}$ |                       |     |        |         |     |     |     |
| tissue development                                                 | GO:0009888 | $4.908 \times 10^{-3}$ |                       |     |        |         |     |     |     |
| tooth mineralization                                               | GO:0034505 | $1.354 \times 10^{-2}$ |                       |     |        |         |     |     |     |
| anatomical structure morphogenesis                                 | GO:0009653 | $2.684 \times 10^{-2}$ |                       |     |        |         |     |     |     |
| extracellular matrix organization                                  | GO:0030198 | $2.785 \times 10^{-2}$ |                       |     |        |         |     |     |     |
| extracellular structure organization                               | GO:0043062 | $2.811 \times 10^{-2}$ |                       |     |        |         |     |     |     |
| external encapsulating structure organization                      | GO:0045229 | $2.863 \times 10^{-2}$ |                       |     |        |         |     |     |     |
| endodermal cell differentiation                                    | GO:0035987 | $3.700 \times 10^{-2}$ |                       |     |        |         |     |     |     |
| GO:CC                                                              |            |                        | stats                 |     |        |         |     |     |     |
| Term na...                                                         | Term ...   | Padj                   | $-\log_{10}(P_{adj})$ | ASP | COL1A1 | COL12A1 | FND | INH | MMP |
| extracellular matrix                                               | GO:0031012 | $1.146 \times 10^{-3}$ |                       |     |        |         |     |     |     |
| external encapsulating structure                                   | GO:0030312 | $1.154 \times 10^{-3}$ |                       |     |        |         |     |     |     |
| extracellular region                                               | GO:0005576 | $1.103 \times 10^{-2}$ |                       |     |        |         |     |     |     |
| collagen-containing extracellular matrix                           | GO:0062023 | $2.516 \times 10^{-2}$ |                       |     |        |         |     |     |     |
| collagen trimer                                                    | GO:0005581 | $4.878 \times 10^{-2}$ |                       |     |        |         |     |     |     |
| activin A complex                                                  | GO:0043509 | $4.997 \times 10^{-2}$ |                       |     |        |         |     |     |     |
| collagen type XII trimer                                           | GO:0005595 | $4.997 \times 10^{-2}$ |                       |     |        |         |     |     |     |
| activin complex                                                    | GO:0048180 | $4.997 \times 10^{-2}$ |                       |     |        |         |     |     |     |
| KEGG                                                               |            |                        | stats                 |     |        |         |     |     |     |
| Term na...                                                         | Term ...   | Padj                   | $-\log_{10}(P_{adj})$ | ASP | COL1A1 | COL12A1 | FND | INH | MMP |
| Protein digestion and absorption                                   | KEGG:04974 | $2.253 \times 10^{-2}$ |                       |     |        |         |     |     |     |

**Figure S4.** The function enrichment analysis of COL1A1, COL12A1, ASPN, FNDC1, INHBA and MMP12 in GC. The MF, BP, CC and KEGG pathway were list with term name, ID, *p*-value and enriched genes. The significance threshold was *g*.SCS threshold.
